# Supplementary material for: Laccase and Biomass Production via Submerged Cultivation of Pleurotus ostreatus Using Wine Lees
Source: MDPI journal article supplement (doi:10.3390/biomass4010001), 2023-12-19
Supplement: s1 [file s1]

## Laccase and biomass production by submerged cultivation of *Pleurotus ostreatus* using wine lees

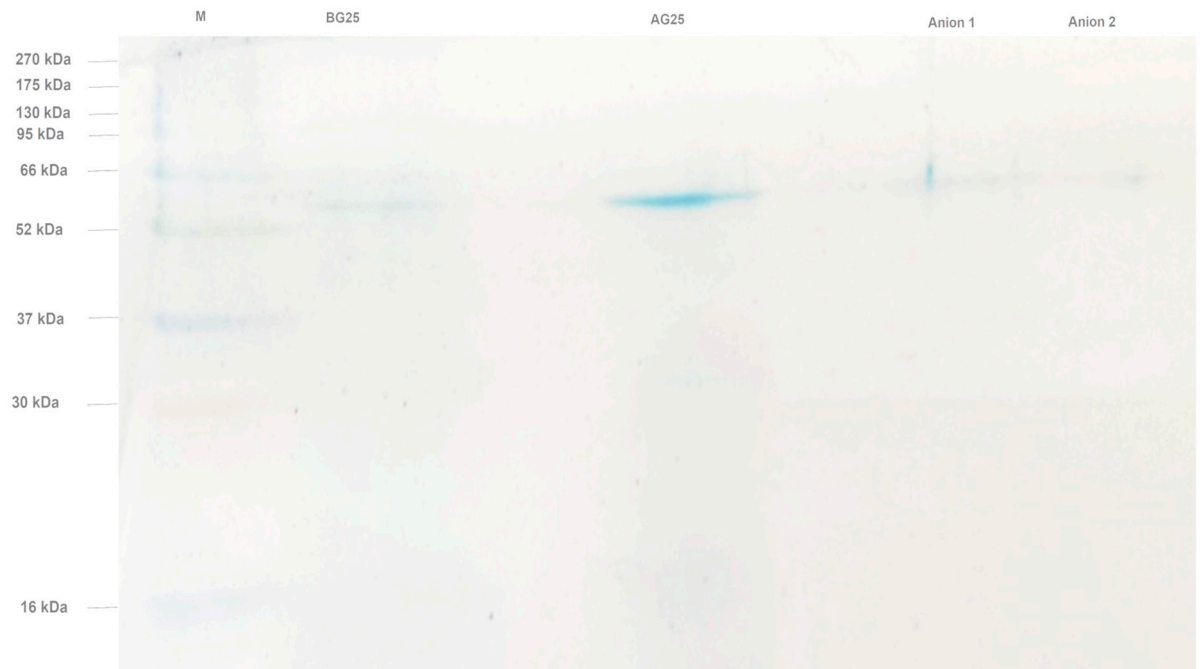

Figure S1. SDS-polyacrylamide Gel-electrophoresis. M: protein molecular weight marker. BG25: Ammonium sulphate precipitated laccase before G25, AG25 after G25 laccase, Anion 1: laccase after anion exchange 1, Anion 2: laccase after anion exchange 2

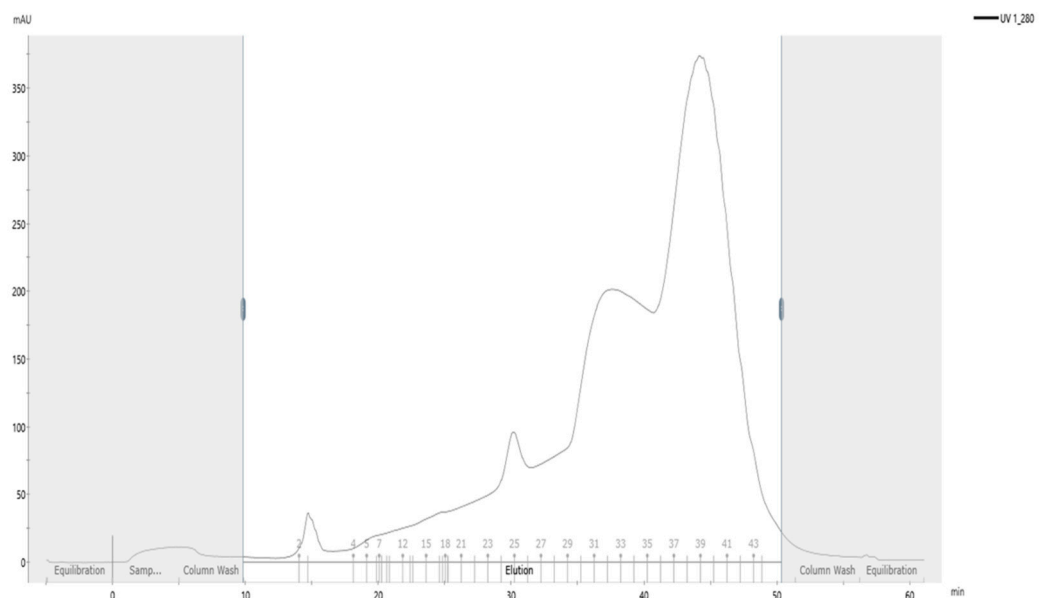

Figure S2. FPLC chromatograph for purification of laccase by HiTrap Q HP (Cytiva,USA). Laccase activity recovered at sample 24,25.

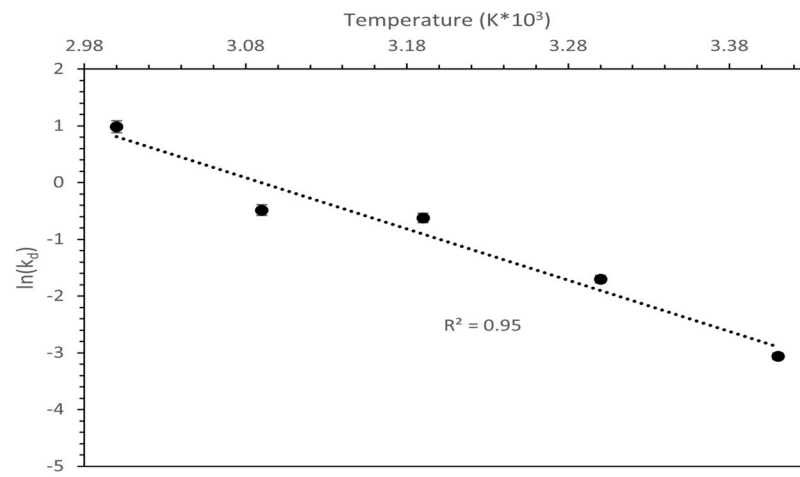

Figure S3. Temperature versus  $\ln(k_d)$  plot for determination of inactivation energy of the purified laccase
